# Supplementary material for: 「夢古道の湯」のリラックス効果 (平成23年度三重大学における共同研究・受託研究の研究成果報告)
Source: Hindawi journal article supplement (doi:10.1155/2020/6076145), 2012-01-01
Supplement: f1 [file 6076145.f1.pdf]

Supplementary Table 1. Characteristics of the the population divided by sex.

|                                    | Men                | Women                | <i>P</i> |
|------------------------------------|--------------------|----------------------|----------|
| Age (year)                         | 53.23 ± 17.03      | 62.54 ± 14.44        | 0.000    |
| Diabetes duration (year)           | 7.00 (2.00 - 13.5) | 11.50 (4.75 - 17.25) | 0.006    |
| BMI (kg/m <sup>2</sup> )           | 27.25 ± 4.75       | 26.05 ± 4.37         | 0.094    |
| WC (cm)                            | 99.21 ± 12.37      | 94.70 ± 10.27        | 0.010    |
| FPG (mmol/l)                       | 8.90 ± 3.87        | 8.34 ± 3.74          | 0.349    |
| UA (umol/l)                        | 359.03 ± 105.97    | 320.00 ± 90.32       | 0.013    |
| TG (mmol/l)                        | 1.59 (1.07 - 2.69) | 1.37 (1.01 - 1.78)   | 0.076    |
| TC (mmol/l)                        | 4.21 ± 1.26        | 4.42 ± 1.34          | 0.316    |
| HDL-c (mmol/l)                     | 0.98 ± 0.25        | 1.13 ± 0.28          | 0.000    |
| LDL-c (mmol/l)                     | 2.78 ± 0.95        | 2.86 ± 1.12          | 0.636    |
| HbA1c (%)                          | 9.25 ± 2.15        | 9.42 ± 2.15          | 0.633    |
| VFA (cm <sup>2</sup> )             | 124.29 ± 46.60     | 96.09 ± 30.82        | 0.000    |
| PrFT (cm)                          | 1.13 ± 0.50        | 0.82 ± 0.46          | 0.000    |
| eGFR (ml/min/1.73 m <sup>2</sup> ) | 101.01 ± 30.45     | 93.54 ± 31.45        | 0.122    |

BMI: body mass index, WC: waist circumference, FPG: fast plasm glucose, UA: uric acid,

TG: triglyceride, TC: total cholesterol, HDL-C: high density lipoprotein-cholesterol,

LDL-C: low density lipoprotein-cholesterol, HbA1c: glycated hemoglobin, VFA: visceral fat area,

PrFT: perirenal fat thickness, eGFR: estimated glomerular filtration rate.
